# Supplementary material
Source: PubMed Central journal article supplement (PMC6158091)
Supplement: NIHMS1503454-supplement-2.pdf [file NIHMS1503454-supplement-2.pdf]

**Supplementary Table 2.** Summary of iCLIP libraries after removal of PCR duplicate reads. For each library, total number of mapped reads, number of reads mapped to all iCLIP peaks, and number of reads mapped to iCLIP peaks in mRNAs were shown. For each cell type, the numbers of iCLIP peaks, the number of target genes and the number of miRNAs detected by iCLIP were shown.

**Supplementary Table 5.** Previously identified miR-155 targets related to the cell types examined in the current study. Identification of the previously reported targets by iCLIP, and their repression measured by RNA-Seq are displayed in the third and fourth columns, respectively.

**Supplementary Table 2.** Summary of iCLIP libraries after removal of PCR duplicate reads.

| <b>Library</b>          | <b>All Reads</b>       | <b>All peak reads</b>  | <b>All mRNA peak reads</b> |
|-------------------------|------------------------|------------------------|----------------------------|
| B_ko1                   | 2492126                | 759636                 | 438815                     |
| B_ko2                   | 2689172                | 905485                 | 512875                     |
| B_ko3                   | 2581463                | 791530                 | 436458                     |
| B_ko4                   | 2538658                | 826296                 | 443815                     |
| B_wt1                   | 3364293                | 1200024                | 586948                     |
| B_wt2                   | 3993056                | 1377560                | 620449                     |
| B_wt3                   | 4372292                | 1621935                | 799756                     |
| B_wt4                   | 3431278                | 1210077                | 578252                     |
| Mac_ko1                 | 1218106                | 306539                 | 186289                     |
| Mac_ko2                 | 1418632                | 324013                 | 177066                     |
| Mac_ko3                 | 1759071                | 344222                 | 210056                     |
| Mac_ko4                 | 1939718                | 419222                 | 235715                     |
| Mac_wt1                 | 3322373                | 1777171                | 1398198                    |
| Mac_wt2                 | 1639473                | 571766                 | 390817                     |
| Mac_wt3                 | 1906323                | 906492                 | 711060                     |
| Mac_wt4                 | 2187457                | 933374                 | 696099                     |
| DC_ko1                  | 2568315                | 859275                 | 479790                     |
| DC_ko2                  | 2558707                | 795935                 | 436427                     |
| DC_ko3                  | 2325644                | 873081                 | 501864                     |
| DC_ko4                  | 2877463                | 1178346                | 657726                     |
| DC_wt1                  | 3157114                | 1691086                | 1112219                    |
| DC_wt2                  | 3215327                | 1612905                | 1057164                    |
| DC_wt3                  | 6328798                | 2989323                | 1908118                    |
| DC_wt4                  | 4782506                | 2382383                | 1496610                    |
| T_ko1                   | 1283140                | 635013                 | 383042                     |
| T_ko2                   | 1029323                | 525647                 | 309182                     |
| T_ko3                   | 1248473                | 671002                 | 397884                     |
| T_ko4                   | 1922192                | 1044818                | 659051                     |
| T_wt1                   | 4533646                | 1744234                | 1001652                    |
| T_wt2                   | 2242162                | 855850                 | 481212                     |
| T_wt3                   | 7140239                | 2971132                | 1691081                    |
| T_wt4                   | 6620193                | 2477666                | 1424119                    |
| <b>Cell type</b>        | <b>Number of peaks</b> | <b>Number of genes</b> | <b>Number of miRNAs</b>    |
| B cell                  | 78372                  | 6879                   | 48                         |
| Macrophage              | 77506                  | 7560                   | 102                        |
| Dendritic               | 77319                  | 5895                   | 109                        |
| CD4 <sup>+</sup> T cell | 77594                  | 6356                   | 102                        |

**Supplementary Table 5.** List of previously known miR-155 targets.

| Target        | Studied cell type                                                                                             | In iCLIP list | RNA-Seq log <sub>2</sub> (Ko/Wt)         |
|---------------|---------------------------------------------------------------------------------------------------------------|---------------|------------------------------------------|
| Aicda (AID)   | B cell <sup>1,2</sup> , human B cell (Raji) <sup>3</sup>                                                      | Yes           | B cell (1.23)                            |
| Spi1 (PU1)    | B cell <sup>4,5</sup> , human dendritic cell <sup>6</sup> , macrophage (Raw264.7) <sup>7</sup>                | Yes (All)     | B cell (0.57), DC (0.69), Mac (0.28)     |
| Inpp5d (SHIP) | Human B cell (DLBCL) <sup>8</sup> , B cell <sup>9</sup> , macrophage (Raw264.7) <sup>10</sup>                 | Yes (All)     | B cell (0.21), Mac (0.26)                |
| Atg3          | Human dendritic cell <sup>11</sup>                                                                            | Yes           | DC (0.15)                                |
| Tab2          | Human dendritic cell <sup>12</sup>                                                                            | Yes           | DC (0.54)                                |
| Peli1         | Human dendritic cell <sup>12</sup>                                                                            | Yes           | DC (0.71)                                |
| Bach1         | Human dendritic cell <sup>12</sup> , macrophage (Raw 264.7) <sup>7</sup>                                      | Yes (All)     | DC (1.03), Mac (0.78)                    |
| Arg2          | Dendritic cell <sup>13</sup>                                                                                  | Yes           | DC (2.23)                                |
| Jarid2        | B cell <sup>14</sup> , human B cell <sup>15</sup> , macrophage (Raw264.7) <sup>7</sup> , T cell <sup>16</sup> | Yes (All)     | B cell (0.90), Mac (0.99), T cell (0.80) |
| Cebpb         | B cell <sup>9</sup> , human dendritic cell <sup>12</sup> , macrophage (Raw264.7) <sup>7</sup>                 | Yes (All)     | B cell (0.96), DC (-1.07), Mac (0.41)    |
| Sla           | Macrophage (Raw264.7) <sup>7</sup>                                                                            | Yes           | Mac (0.30)                               |
| Cux1          | Macrophage (Raw264.7) <sup>7</sup>                                                                            | Yes           | Mac (0.21)                               |
| Arntl         | Macrophage <sup>7,17</sup>                                                                                    | Yes           | Mac (0.32)                               |
| Hif1a         | Macrophage (Raw264.7) <sup>7</sup>                                                                            | Yes           | Mac (-0.15)                              |
| Picalm        | Macrophage (Raw264.7) <sup>7</sup>                                                                            | Yes           | Mac (0.89)                               |
| Bcl6          | Macrophage (Raw264.7) <sup>18</sup>                                                                           | Yes           | Mac (0.18)                               |
| Ets1          | T cell <sup>19</sup>                                                                                          | Yes           | T cell (0.32)                            |
| Fosl2         | T cell <sup>20</sup>                                                                                          | Yes           | T cell (0.13)                            |
| Ikbke         | B cell <sup>21</sup> , Macrophage <sup>22</sup>                                                               | Yes (All)     | B cell (0.12), Mac (-0.03)               |
| Cd1d1 (Cd1d)  | Dendritic cell <sup>23</sup>                                                                                  | Yes           | DC (0.64)                                |
| Csf1r         | Macrophage (Raw 264.7) <sup>7</sup>                                                                           | No            | Mac (0.15)                               |
| Gcsam (HGAL)  | Human B cell <sup>24</sup>                                                                                    | No            | B cell (undetectable)                    |
| Socs1         | macrophage (Raw264.7) <sup>25</sup> , T cell <sup>26</sup>                                                    | No            | Mac (-0.04), T cell (-0.07)              |
| Hdac4         | Human T cell (Jurkat) <sup>27</sup>                                                                           | No            | T cell (0.01)                            |
| S1pr1         | Human T cell (Jurkat) <sup>28</sup>                                                                           | No            | T cell (0.55)                            |
| Casp3         | Macrophage (Raw267.4) <sup>29</sup>                                                                           | No            | Mac (0.19)                               |
| Rheb          | Macrophage (Raw264.7) <sup>30</sup>                                                                           | No            | Mac (0.02)                               |

**Supplementary Table 9.** List of nucleic acid sequences.

| <b>iCLIP</b>                                     |                                                                           |
|--------------------------------------------------|---------------------------------------------------------------------------|
| L32                                              | /5rApp/GTGTCACTTCCAGCGG/3ddc/                                             |
| RT primers (4-letter barcode underlined)         | /5Phos/DDDC <u>GAT</u> NNNNNNNAGATCGGAAGAGCGTCGT/idSp/CCGCTGGAAGTGAC      |
| PCR forward primer                               | AATGATACGGCGACCACCGAGATCTACACTCTTTCCCTACACGACGCTCTTCCGATCT                |
| PCR reverse primer                               | CAAGCAGAAGACGGCATAACGAGATCTCGGCATTCCTGCGCTGGAAGTACTGACAC                  |
| Sequencing primer read 1                         | ACACTCTTTCCCTACACGACGCTCTTCCGATCT                                         |
| Sequencing primer read 2                         | TCGGCATTCCTGCGCTGGAAGTACTGACAC                                            |
| <b>PolyA-Seq</b>                                 |                                                                           |
| RT_1                                             | CCGTGTGGTCGCCTTTTTTTTTTVN                                                 |
| Ext_primer_1                                     | ACGACGCTCTTCCGATCTNNNNNN                                                  |
| PCR forward primer                               | AATGATACGGCGACCACCGAGATCTACACTCTTTCCCTACACGACGCTCTTCCGATCT                |
| PCR reverse primer (5-letter barcode underlined) | CAAGCAGAAGACGGCATAACGAGATA <u>AAAGCT</u> TCTGGCCCGCTGACCCGTGTGGTCGCCTTTTT |
| Sequencing primer read 1                         | ACACTCTTTCCCTACACGACGCTCTTCCGATCT                                         |
| Sequencing primer read 2                         | TTCTGGCCCGCTGACCCGTGTGGTCGCCTTTTTTTTTT                                    |
| Sequencing primer index                          | AAAAGGCGACCACACGGGTCAGCGGGCCAGAA                                          |

**Supplementary Table 10.** List of nucleic acid sequences of primers and synthesized 3'UTR.

| Name          | Sequence                                      |
|---------------|-----------------------------------------------|
| Actr10        | ACGCTTGAATACATCCAGCC.....AGATATGTTGTATTTATATC |
| Act10_mut_F   | GTATTTTCTCTTTcgtaTAATATTTAATTCATCTGAC         |
| Act10_mut_R   | tacgAAAGAGAAAATACAGAAATGCTTTG                 |
| Hif1a_F       | TGGTGGCTCAGCAGTCTA                            |
| Hif1a_R       | GCCTGGTCCACAGAAGATGTTTAT                      |
| Hif1a_mut_F   | GAGTAATTTTAGAAcgtaTATTTTAGGAATATAGAGTTG       |
| Hif1a_mut_R   | tacgTTCTAAAATTACTCACTTATTG                    |
| Jarid2_F      | TCTCAACAAAACCCACACCAAAAA                      |
| Jarid2_R      | CGAACGGATGCATAGTGA                            |
| Jarid2_mut_F  | GAAGTATTTTGTGTTTAcgtaTAAACTGTTCAAGTTTTGTACG   |
| Jarid2_mut_R  | tacgTAAAACAAAATCAGTTCTCTAAAACC                |
| Terf1         | GACACTGGAGGCTGGATGG.....ATACAAAAGAGTCTAATAAG  |
| Terf1_mut_F   | TAATGATAAAcgtaTATGGTGGTGGTGGG                 |
| Terf1_mut_R   | tacgTTTATCATTACTGACCAGGA                      |
| Tbca_F        | TGACATTTTTCTGTATGGGATG                        |
| Tbca_R        | TGGCCAACGAAAATTTGGT                           |
| Tbca_mut_F    | GGGATGTTTTTTTcgtaTAAATCCTGGGGTCCATTCTAC       |
| Tbca_mut_R    | tacgAAAAAACATCCCATACAGAAAAATG                 |
| Uqcrfs1       | ACACGTGGACTCAGGGCCTA.....TGTCTTTGATAGCTAATTCT |
| Uqcrfs1_mut_F | ATATTATCAAcgtaTAGCATAATAAAACC                 |
| Uqcrfs1_mut_R | tacgTTGATAATATTTAACAGTGAATTC                  |
| Zfp277        | GAGAAGCTGCTGCAGGCACA.....ATTTTTCAAGAAATAAGAAA |
| Zfp277_mut_F  | TGTCCACACAcgtaTATTCACGGCTGAAATC               |
| Zfp277_mut_R  | tacgTGTGTGGACAATCAAATCTGAAC                   |

## References

1. Teng, G. *et al.* MicroRNA-155 is a negative regulator of activation-induced cytidine deaminase. *Immunity* **28**, 621-629 (2008).
2. Dorsett, Y. *et al.* MicroRNA-155 suppresses activation-induced cytidine deaminase-mediated Myc-Igh translocation. *Immunity* **28**, 630-638 (2008).
3. Basso, K. *et al.* BCL6 positively regulates AID and germinal center gene expression via repression of miR-155. *J Exp Med* **209**, 2455-2465 (2012).
4. Vigorito, E. *et al.* microRNA-155 regulates the generation of immunoglobulin class-switched plasma cells. *Immunity* **27**, 847-859 (2007).
5. Lu, D. *et al.* The miR-155-PU.1 axis acts on Pax5 to enable efficient terminal B cell differentiation. *J Exp Med* **211**, 2183-2198 (2014).
6. Martinez-Nunez, R.T., Louafi, F., Friedmann, P.S. & Sanchez-Elsner, T. MicroRNA-155 modulates the pathogen binding ability of dendritic cells (DCs) by down-regulation of DC-specific intercellular adhesion molecule-3 grabbing non-integrin (DC-SIGN). *J Biol Chem* **284**, 16334-16342 (2009).
7. O'Connell, R.M. *et al.* Sustained expression of microRNA-155 in hematopoietic stem cells causes a myeloproliferative disorder. *J Exp Med* **205**, 585-594 (2008).
8. Pedersen, I.M. *et al.* Onco-miR-155 targets SHIP1 to promote TNFalpha-dependent growth of B cell lymphomas. *EMBO Mol Med* **1**, 288-295 (2009).
9. Costinean, S. *et al.* Src homology 2 domain-containing inositol-5-phosphatase and CCAAT enhancer-binding protein beta are targeted by miR-155 in B cells of Emicro-MiR-155 transgenic mice. *Blood* **114**, 1374-1382 (2009).
10. O'Connell, R.M., Chaudhuri, A.A., Rao, D.S. & Baltimore, D. Inositol phosphatase SHIP1 is a primary target of miR-155. *Proc Natl Acad Sci U S A* **106**, 7113-7118 (2009).
11. Etna, M.P. *et al.* Mycobacterium tuberculosis-induced miR-155 subverts autophagy by targeting ATG3 in human dendritic cells. *PLoS Pathog* **14**, e1006790 (2018).
12. Ceppi, M. *et al.* MicroRNA-155 modulates the interleukin-1 signaling pathway in activated human monocyte-derived dendritic cells. *Proc Natl Acad Sci U S A* **106**, 2735-2740 (2009).

13. Dunand-Sauthier, I. *et al.* Repression of arginase-2 expression in dendritic cells by microRNA-155 is critical for promoting T cell proliferation. *J Immunol* **193**, 1690-1700 (2014).
14. Nakagawa, R. *et al.* MicroRNA-155 controls affinity-based selection by protecting c-MYC+ B cells from apoptosis. *J Clin Invest* **126**, 377-388 (2016).
15. Zheng, Y. *et al.* miR-155 Regulates IL-10-Producing CD24(hi)CD27(+) B Cells and Impairs Their Function in Patients with Crohn's Disease. *Front Immunol* **8**, 914 (2017).
16. Escobar, T.M. *et al.* miR-155 activates cytokine gene expression in Th17 cells by regulating the DNA-binding protein Jarid2 to relieve polycomb-mediated repression. *Immunity* **40**, 865-879 (2014).
17. Curtis, A.M. *et al.* Circadian control of innate immunity in macrophages by miR-155 targeting Bmal1. *Proc Natl Acad Sci U S A* **112**, 7231-7236 (2015).
18. Nazari-Jahantigh, M. *et al.* MicroRNA-155 promotes atherosclerosis by repressing Bcl6 in macrophages. *J Clin Invest* **122**, 4190-4202 (2012).
19. Hu, R. *et al.* MicroRNA-155 confers encephalogenic potential to Th17 cells by promoting effector gene expression. *J Immunol* **190**, 5972-5980 (2013).
20. Hu, R. *et al.* miR-155 promotes T follicular helper cell accumulation during chronic, low-grade inflammation. *Immunity* **41**, 605-619 (2014).
21. Lu, F. *et al.* Epstein-Barr virus-induced miR-155 attenuates NF-kappaB signaling and stabilizes latent virus persistence. *J Virol* **82**, 10436-10443 (2008).
22. Ruggiero, T. *et al.* LPS induces KH-type splicing regulatory protein-dependent processing of microRNA-155 precursors in macrophages. *FASEB J* **23**, 2898-2908 (2009).
23. Liu, F. *et al.* TLR9-induced miR-155 and Ets-1 decrease expression of CD1d on B cells in SLE. *Eur J Immunol* **45**, 1934-1945 (2015).
24. Dagan, L.N. *et al.* miR-155 regulates HGAL expression and increases lymphoma cell motility. *Blood* **119**, 513-520 (2012).
25. Androulidaki, A. *et al.* The kinase Akt1 controls macrophage response to lipopolysaccharide by regulating microRNAs. *Immunity* **31**, 220-231 (2009).
26. Loeb, G.B. *et al.* Transcriptome-wide miR-155 binding map reveals widespread noncanonical microRNA targeting. *Mol Cell* **48**, 760-770 (2012).

27. Sandhu, S.K. *et al.* miR-155 targets histone deacetylase 4 (HDAC4) and impairs transcriptional activity of B-cell lymphoma 6 (BCL6) in the Emu-miR-155 transgenic mouse model. *Proc Natl Acad Sci U S A* **109**, 20047-20052 (2012).
28. Okoye, I.S. *et al.* Transcriptomics identified a critical role for Th2 cell-intrinsic miR-155 in mediating allergy and antihelminth immunity. *Proc Natl Acad Sci U S A* **111**, E3081-3090 (2014).
29. De Santis, R. *et al.* miR-155 targets Caspase-3 mRNA in activated macrophages. *RNA Biol* **13**, 43-58 (2016).
30. Wang, J. *et al.* MicroRNA-155 promotes autophagy to eliminate intracellular mycobacteria by targeting Rheb. *PLoS Pathog* **9**, e1003697 (2013).
